# Supplementary material
Source: Springer Nature journal article supplement (https://www.springermedizin.de/resource/supplementary/12967_2013_1759_MOESM6_ESM.pdf/9575252)
Supplement: MOESM6 [file 9575252]

Paired

miRNA expression  
profiling data

Gene expression  
profiling data

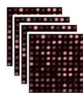

miRNA array

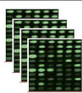

Gene array

Student t-tests

Outlier miRNAs

| miRNA ID | p-value |
|----------|---------|
| miRNA_1  | 5E-19   |
| miRNA_2  | 9E-16   |
| .....    | .....   |

Outlier Genes

| Gene ID | p-value |
|---------|---------|
| Gene_1  | 7E-19   |
| Gene_2  | 9E-15   |
| .....   | .....   |

Pearson  
correlation test

Negative correlation pairs

| miRNA ID | Gene ID | Cor.value |
|----------|---------|-----------|
| miRNA_1  | Gene_1  | -0.95     |
| miRNA_2  | Gene_2  | -0.8      |
| .....    | .....   | .....     |

Enrichment analysis  
for target genes

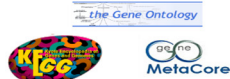

miRNA-gene interaction data

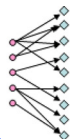

miRecords  
Tarbase  
HOCTAR  
.....

Condition-specific miRNA-  
gene interaction network

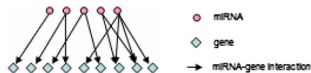

Candidate miRNA biomarkers

| Rank | miRNA ID | NOD value | P.value |
|------|----------|-----------|---------|
| 1    | miRNA_1  | 40        | 6E-10   |
| 2    | miRNA_2  | 35        | 7E-8    |
| ...  | .....    | .....     | .....   |
